# Supplementary material
Source: PubMed Central journal article supplement (PMC9069994)
Supplement: NEJMoa2116620_data-sharing.pdf [file NEJMoa2116620_data-sharing.pdf]

## Data Sharing Statement

Levin MJ, Ustianowski A, De Wit S, et al. Intramuscular AZD7442 (Tixagevimab–Cilgavimab) for Prevention of Covid-19. N Engl J Med. DOI: 10.1056/NEJMoa2116620.

| Question                                                            | Authors' Response                                                                                                                                                                                                                                                                                   |
|---------------------------------------------------------------------|-----------------------------------------------------------------------------------------------------------------------------------------------------------------------------------------------------------------------------------------------------------------------------------------------------|
| Will the data collected for your study be made available to others? | Yes                                                                                                                                                                                                                                                                                                 |
| Would you like to offer context for your decision?                  | —                                                                                                                                                                                                                                                                                                   |
| Which data?                                                         | —                                                                                                                                                                                                                                                                                                   |
| Additional information about data                                   | —                                                                                                                                                                                                                                                                                                   |
| How or where can the data be obtained?                              | Data underlying the findings described in this manuscript may be obtained in accordance with AstraZeneca's data sharing policy described at <a href="https://astrazenecagrouptrials.pharmacm.com/ST/Submission/Disclosure">https://astrazenecagrouptrials.pharmacm.com/ST/Submission/Disclosure</a> |
| When will data availability begin?                                  | Data underlying the findings described in this manuscript may be obtained in accordance with AstraZeneca's data sharing policy described at <a href="https://astrazenecagrouptrials.pharmacm.com/ST/Submission/Disclosure">https://astrazenecagrouptrials.pharmacm.com/ST/Submission/Disclosure</a> |
| When will data availability end?                                    | —                                                                                                                                                                                                                                                                                                   |
| Will any supporting documents be available?                         | —                                                                                                                                                                                                                                                                                                   |
| Which supporting documents?                                         | —                                                                                                                                                                                                                                                                                                   |
| Additional information about supporting documents                   | —                                                                                                                                                                                                                                                                                                   |
| How or where can supporting documents be obtained?                  | —                                                                                                                                                                                                                                                                                                   |
| When will supporting documents availability begin?                  | —                                                                                                                                                                                                                                                                                                   |
| When will supporting documents availability end?                    | —                                                                                                                                                                                                                                                                                                   |
| To whom will data be available?                                     | AstraZeneca Group of Companies allows researchers to submit a request to access anonymized patient level clinical data, aggregate clinical or genomics data (when available) and/or anonymized clinical study reports through Vivli web-based data request platform.                                |

|                                       |                                                                                                                                                                                                                                                                                                     |
|---------------------------------------|-----------------------------------------------------------------------------------------------------------------------------------------------------------------------------------------------------------------------------------------------------------------------------------------------------|
| For what type of analysis or purpose? | Data underlying the findings described in this manuscript may be obtained in accordance with AstraZeneca's data sharing policy described at <a href="https://astrazenecagrouptrials.pharmacm.com/ST/Submission/Disclosure">https://astrazenecagrouptrials.pharmacm.com/ST/Submission/Disclosure</a> |
| By what mechanism?                    | Data underlying the findings described in this manuscript may be obtained in accordance with AstraZeneca's data sharing policy described at <a href="https://astrazenecagrouptrials.pharmacm.com/ST/Submission/Disclosure">https://astrazenecagrouptrials.pharmacm.com/ST/Submission/Disclosure</a> |
| Any other restrictions?               | —                                                                                                                                                                                                                                                                                                   |
| Additional information                | —                                                                                                                                                                                                                                                                                                   |

This statement was posted on April 20, 2022, at NEJM.org.
